# Supplementary material for: Epidemiology of Antibiotic Resistant Pathogens in Pediatric Urinary Tract Infections as a Tool to Develop a Prediction Model for Early Detection of Drug-Specific Resistance
Source: MDPI journal article supplement (doi:10.3390/antibiotics11060720), 2022-05-26
Supplement: s1 [file s1]

Supplementary Figure S1. ROC curve and AUC of training and validation data sets

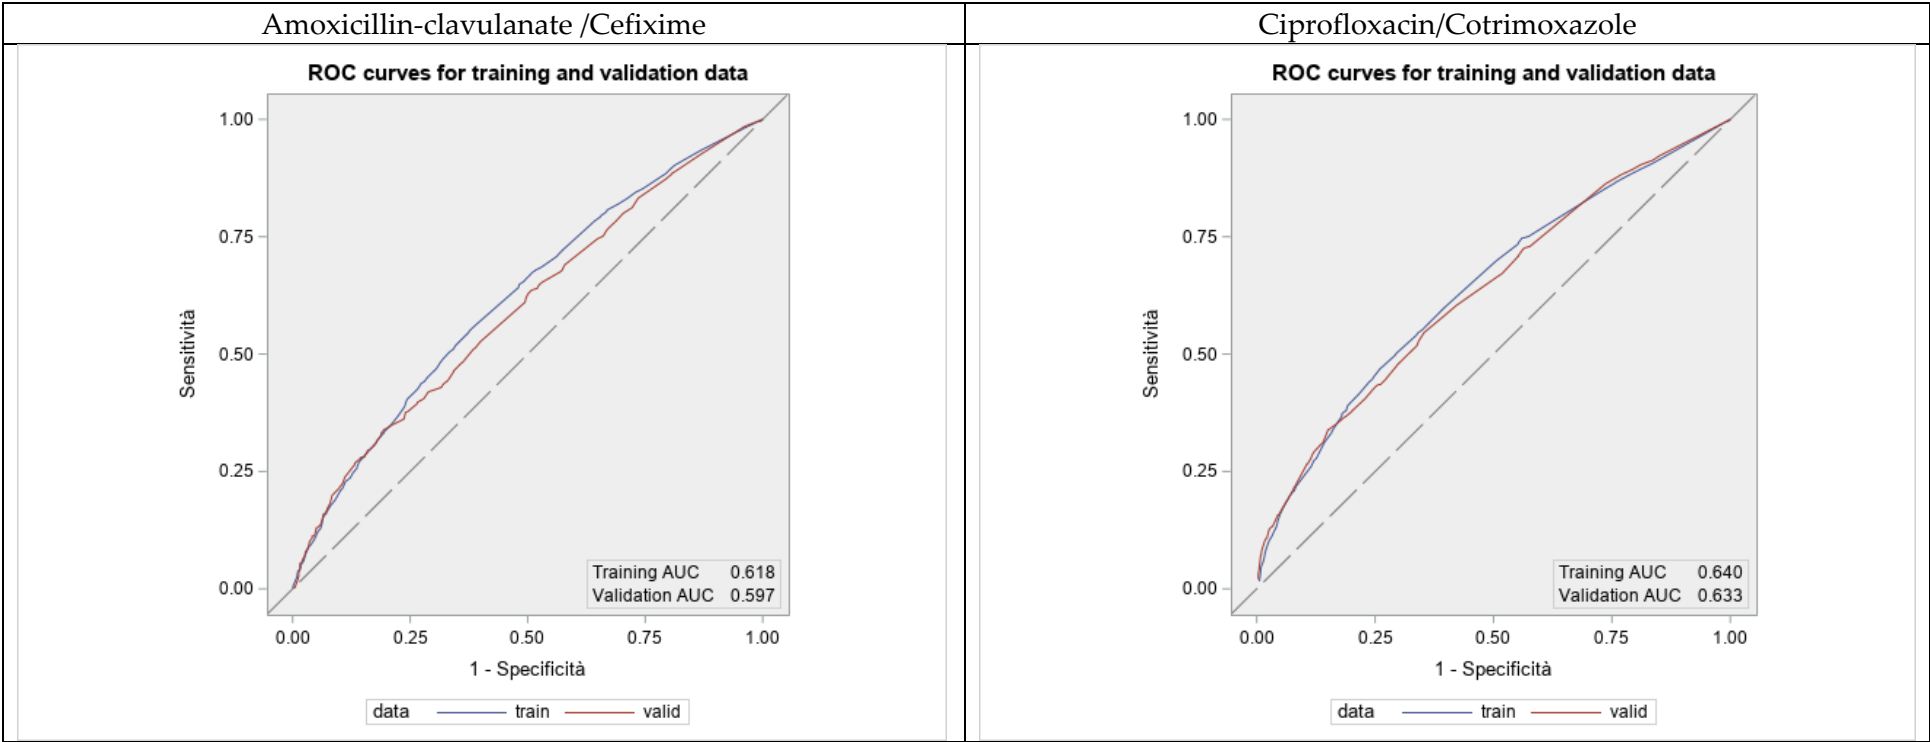

**Supplementary Figure S2.** Box plots of predicted probabilities and discrimination slope in the training and validation data sets

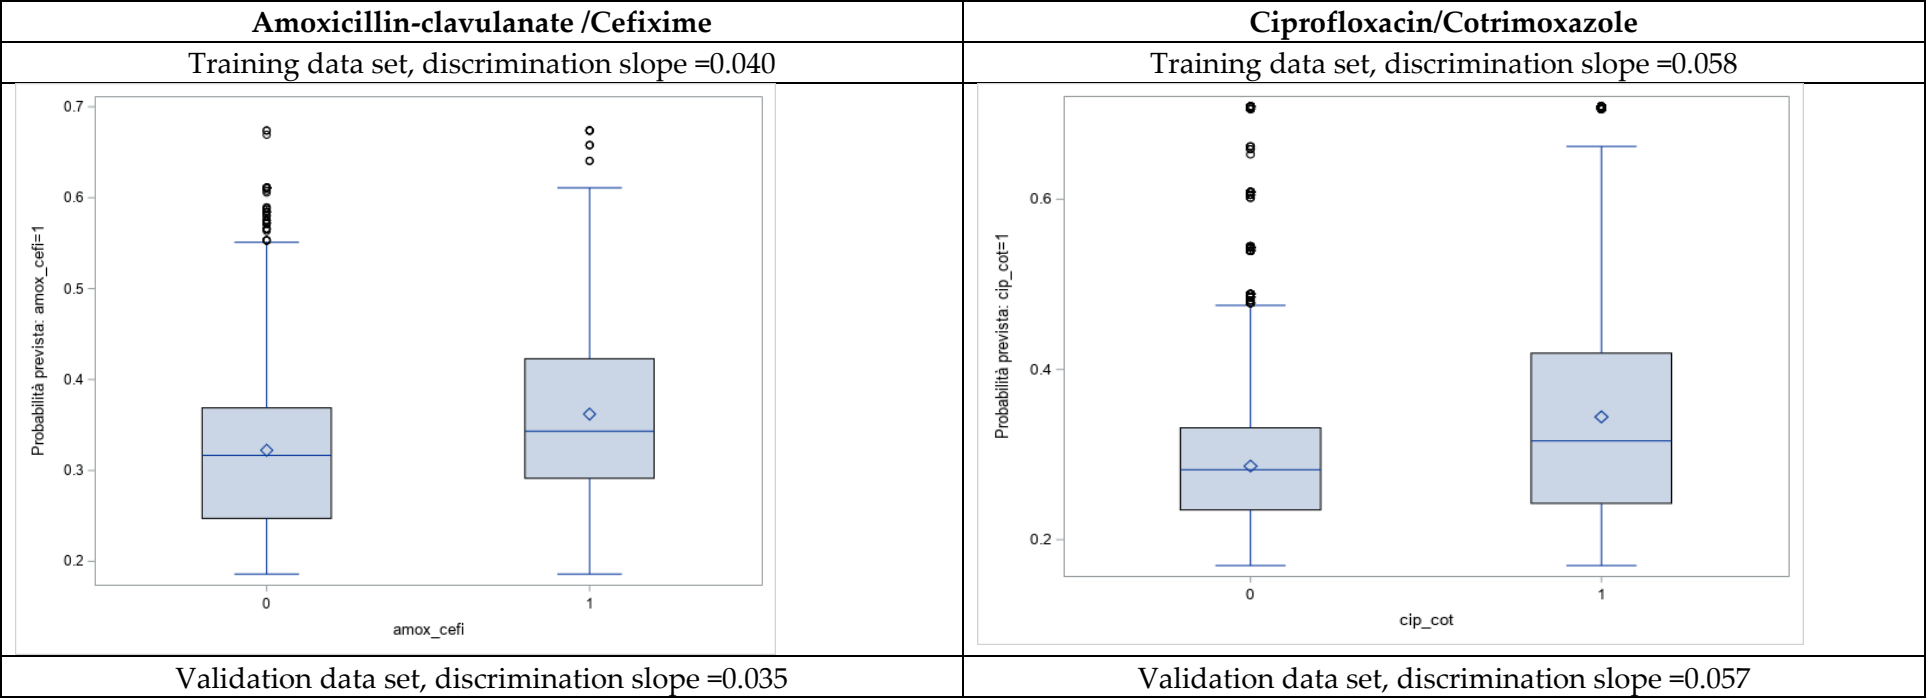

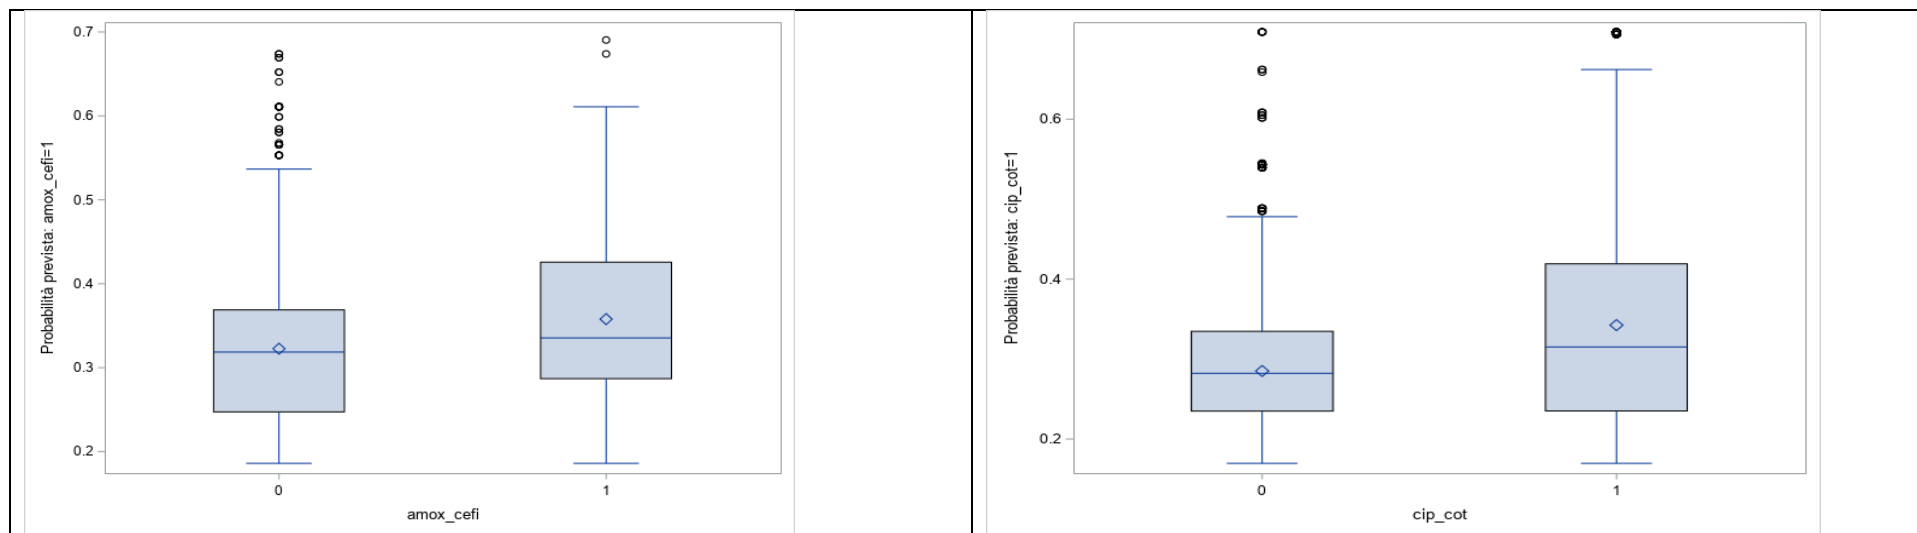

**Supplementary Figure S3.** ROC curve and AUC of 10-fold cross validations-internal validations

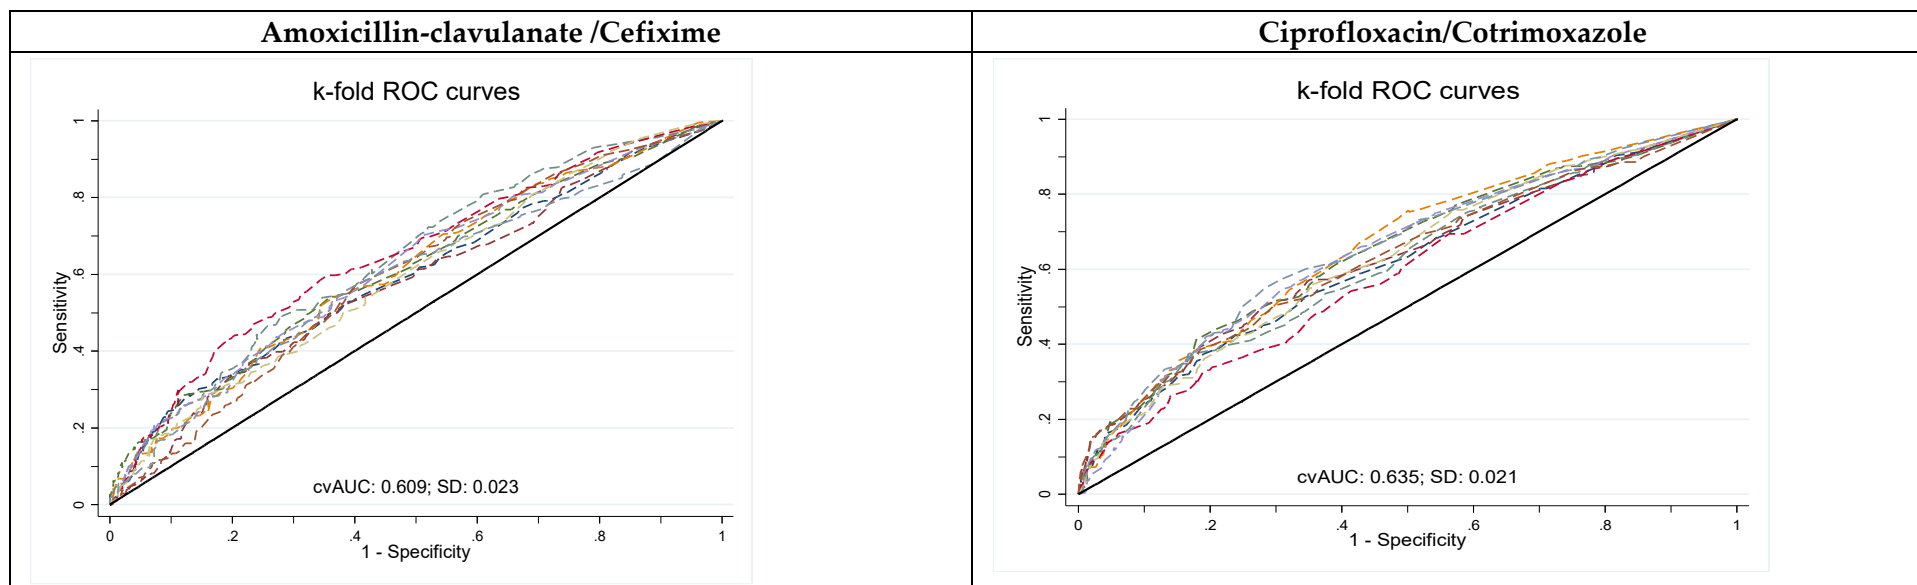

**Supplementary Table S1.** Distribution of 9449 bacterial pathogens isolated

*Escherichia coli*: n=4902 (51.9%), other *Enterobacteriales*: n=2694 (28.5%), other non-fermenting Gram-negatives: n=61 (0.6%), *Pseudomonas aeruginosa*: n=566 (6.0%), *Enterococcus* spp.: 995 (10.5%) and other Gram-positives: n=231 (2.4%)

| Pathogens                                            | n (%)       | Group of pathogens                  |
|------------------------------------------------------|-------------|-------------------------------------|
| <i>Escherichia coli</i>                              | 4902 (51.9) | <i>Escherichia coli</i>             |
| <i>Pseudomonas aeruginosa</i>                        | 566 (6.0)   | <i>Pseudomonas aeruginosa</i>       |
| Other <i>Enterobacteriales</i>                       | 2694 (28.5) | Other <i>Enterobacteriales</i>      |
| <i>Citrobacter braakii</i>                           | 8           |                                     |
| <i>Citrobacter farmeri</i>                           | 3           |                                     |
| <i>Citrobacter freundii</i>                          | 69          |                                     |
| <i>Citrobacter koseri</i>                            | 78          |                                     |
| <i>Citrobacter species</i>                           | 3           |                                     |
| <i>Citrobacter</i> spp.                              | 12          |                                     |
| <i>Citrobacter youngae</i>                           | 3           |                                     |
| <i>Enterobacter aerogenes</i>                        | 95          |                                     |
| <i>Enterobacter asburiae</i>                         | 1           |                                     |
| <i>Enterobacter cloacae</i>                          | 191         |                                     |
| <i>Enterobacter hormaechei</i>                       | 3           |                                     |
| <i>Enterobacter</i> spp.                             | 16          |                                     |
| <i>Escherichia hermannii</i>                         | 1           |                                     |
| <i>Klebsiella oxytoca</i>                            | 307         |                                     |
| <i>Klebsiella ozonae</i>                             | 1           |                                     |
| <i>Klebsiella</i> spp                                | 14          |                                     |
| <i>Morganella morganii</i>                           | 109         |                                     |
| <i>Proteus mirabilis</i>                             | 988         |                                     |
| <i>Proteus</i> spp.                                  | 44          |                                     |
| <i>Proteus vulgaris/penneri</i>                      | 59          |                                     |
| <i>Providencia rettgeri</i>                          | 3           |                                     |
| <i>Providencia stuartii</i>                          | 2           |                                     |
| <i>Raoultella ornithinolytica</i>                    | 1           |                                     |
| <i>Salmonella</i> spp.                               | 3           |                                     |
| <i>Serratia liquefaciens</i>                         | 2           |                                     |
| <i>Serratia marcescens</i>                           | 39          |                                     |
| <i>Serratia plymuthica</i>                           | 1           |                                     |
| <i>Serratia</i> spp.                                 | 5           |                                     |
| <i>Klebsiella pneumoniae</i>                         | 633         |                                     |
| Other non-fermenting Gram-negatives                  | 61 (0.6)    | Other non-fermenting Gram-negatives |
| <i>Achromobacter</i> spp.                            | 1           |                                     |
| <i>Acinetobacter baumannii/calcoaceticus complex</i> | 9           |                                     |
| <i>Acinetobacter junii</i>                           | 2           |                                     |

| Pathogens                            | n (%)      | Group of pathogens      |
|--------------------------------------|------------|-------------------------|
| <i>Acinetobacter lwoffii</i>         | 1          |                         |
| <i>Acinetobacter</i> spp.            | 3          |                         |
| <i>Pseudomonas fluorescens</i>       | 2          |                         |
| <i>Pseudomonas pseudoalcaligenes</i> | 3          |                         |
| <i>Pseudomonas putida</i>            | 7          |                         |
| <i>Pseudomonas</i> spp.              | 29         |                         |
| <i>Stenotrophomonas maltophilia</i>  | 4          |                         |
| Other Gram-positives                 | 231 (2.4)  | Other Gram-positives    |
| <i>Staphylococcus aureus</i>         | 61         |                         |
| <i>Staphylococcus saprophyticus</i>  | 1          |                         |
| <i>Streptococcus agalactiae</i>      | 169        |                         |
| Enterococci                          | 995 (10.5) | <i>Enterococcus</i> spp |
| <i>Enterococcus casseliflavus</i>    | 1          |                         |
| <i>Enterococcus faecalis</i>         | 850        |                         |
| <i>Enterococcus faecium</i>          | 99         |                         |
| <i>Enterococcus gallinarum</i>       | 3          |                         |
| <i>Enterococcus</i> spp.             | 42         |                         |

**Supplementary Table S2.** Characteristics of study population and culture reports of positive samples

| <b>Total patients, n(%)</b>                                                             | <b>6207 (100.0)</b> |
|-----------------------------------------------------------------------------------------|---------------------|
| Sex, F                                                                                  | 3136 (50.5)         |
| Age at the 1 <sup>st</sup> sample, median (IQR), min-max values, years                  | 1.8 (0.4-6.8), 0-19 |
| ≤6 months                                                                               | 1685 (27.2)         |
| >6 months                                                                               | 4522 (72.8)         |
| Total numbers of bacterial pathogens isolated for patient, median (IQR), min-max values | 1 (1-1), 1-55       |
| 1                                                                                       | 4775 (76.9)         |
| 2                                                                                       | 812 (13.1)          |
| >2                                                                                      | 620 (10.0)          |
| <b>Total isolated pathogens<sup>1</sup></b>                                             | <b>9449 (100.0)</b> |
| Age at sample, median (IQR), min-max values, years                                      | 2.5 (0.6-8.3), 0-19 |
| Department of admission                                                                 |                     |
| Emergency                                                                               | 4679 (49.5)         |
| Surgery/Orthopedics/Neurosurgery                                                        | 1280 (13.5)         |
| Nephrology                                                                              | 1044 (11.0)         |
| Infectious Diseases                                                                     | 414 (4.4)           |
| Neonatal or Pediatric ICU                                                               | 383 (4.1)           |
| Hematology/Oncology                                                                     | 353 (3.7)           |
| Others                                                                                  | 1296 (13.7)         |
| Days from previous pathogens isolated, median (IQR), min-max values                     | 94 (29-316) 0-4194  |
| <b>Patients aged ≤6 months at the 1<sup>st</sup> sample</b>                             | <b>1685 (100.0)</b> |
| Sex, F                                                                                  | 602 (35.7)          |
| Total numbers of pathogens isolated for patient, median (IQR), min-max values           | 1 (1-2) 1-23        |
| 1                                                                                       | 1238 (73.5)         |
| 2                                                                                       | 239 (14.2)          |
| >2                                                                                      | 208 (12.3)          |
| Department of admission                                                                 |                     |
| Emergency                                                                               | 954 (56.6)          |
| Hematology/Oncology/ Neonatal or Pediatric ICU /Others                                  | 389 (23.1)          |
| Infectious Diseases                                                                     | 186 (11.0)          |
| Surgery/Orthopedics/Neurosurgery                                                        | 88 (5.2)            |
| Nephrology                                                                              | 68 (4.0)            |

<sup>1</sup>9449 pathogen isolated in 9356 samples, 0.9% of samples had more than one isolate

**Supplementary Table S3.** Distribution of isolated pathogens resistant to different antibiotics.  
Proportions are number of resistant over number of tested strains

|                                                  | Resistant, n | Susceptible, n | % Resistant/Tested,<br>(95% CI) |
|--------------------------------------------------|--------------|----------------|---------------------------------|
| <b><i>Escherichia coli</i>, n=4902</b>           |              |                |                                 |
| Amikacin                                         | 2            | 3000           | 0.07 (0-0.3)                    |
| Amoxicillin-clavulanate                          | 1428         | 3350           | 29.9 (28.4-31.4)                |
| Ampicillin                                       | 2685         | 1882           | 58.8 (57.1-60.5)                |
| Cefixime                                         | 202          | 1689           | 10.7 (9.1-12.5)                 |
| Cefuroxime                                       | 336          | 3071           | 9.9 (8.7-11.2)                  |
| Cefotaxime                                       | 297          | 3442           | 7.9 (6.9-9.1)                   |
| Ceftazidime                                      | 273          | 4617           | 5.6 (4.9-6.4)                   |
| Ciprofloxacin                                    | 503          | 4391           | 10.3 (9.1-11.5)                 |
| Fosfomycin                                       | 43           | 4113           | 1.0 (0.6-1.6)                   |
| Gentamicin                                       | 344          | 4548           | 7.0 (6.2-8.0)                   |
| Meropenem                                        | 1            | 4891           | 0 (0-0.1)                       |
| Nitrofurantoin                                   | 22           | 4702           | 0.5 (0.3-0.7)                   |
| Cotrimoxazole                                    | 1518         | 3375           | 31.0 (29.4-32.7)                |
| Piperacillin-tazobactam                          | 468          | 4421           | 9.6 (8.6-10.6)                  |
| <b>Other <i>Enterobacteriales</i>, n=2694</b>    |              |                |                                 |
| Amikacin                                         | 22           | 1567           | 1.4 (0.8-2.3)                   |
| Amoxicillin-clavulanate                          | 981          | 1579           | 38.3 (36.1-40.6)                |
| Ampicillin                                       | 1864         | 518            | 78.2 (76.3-80.1)                |
| Cefixime                                         | 205          | 881            | 18.9 (16.3-21.7)                |
| Cefuroxime                                       | 398          | 1264           | 23.9 (21.8-26.3)                |
| Cefotaxime                                       | 257          | 1829           | 12.3 (10.7-14.1)                |
| Ceftazidime                                      | 295          | 2386           | 11.0 (9.7-12.5)                 |
| Ciprofloxacin                                    | 222          | 2454           | 8.3 (7.0-9.8)                   |
| Fosfomycin                                       | 423          | 1743           | 19.5 (17.7-21.5)                |
| Gentamicin                                       | 419          | 2251           | 15.7 (14.1-17.4)                |
| Meropenem                                        | 22           | 2658           | 0.8 (0.5-1.4)                   |
| Nitrofurantoin                                   | 973          | 449            | 68.4 (65.6-71.1)                |
| Cotrimoxazole                                    | 605          | 2076           | 22.6 (20.6-24.6)                |
| Piperacillin-tazobactam                          | 373          | 2287           | 14.0 (12.6-15.6)                |
| <b><i>Pseudomonas aeruginosa</i>, n=566</b>      |              |                |                                 |
| Amikacin                                         | 13           | 345            | 3.6 (2.1-6.3)                   |
| Ceftazidime                                      | 41           | 520            | 7.3 (4.6-11.5)                  |
| Ciprofloxacin                                    | 24           | 533            | 4.3 (2.5-7.2)                   |
| Fosfomycin                                       | 20           | 9              | 70.0 (46.4-85.1)                |
| Meropenem                                        | 30           | 529            | 5.4 (3.6-7.8)                   |
| Piperacillin-tazobactam                          | 46           | 509            | 8.3 (5.1-13.1)                  |
| <b>Enterococci, n=995</b>                        |              |                |                                 |
| Ampicillin                                       | 79           | 867            | 8.3 (6.7-10.4)                  |
| Teicoplanin                                      | 6            | 951            | 0.6 (0.3-1.4)                   |
| Vancomycin                                       | 11           | 980            | 1.1 (0.6-2.0)                   |
| <b>Other Gram-positives, n=231</b>               |              |                |                                 |
| Ampicillin                                       | 23           | 0              | 100.0                           |
| Amoxicillin-clavulanate                          | 2            | 10             | 16.7 (3.3-54.3)                 |
| <b>Other non-fermenting Gram-negatives, n=61</b> |              |                |                                 |

|                         | <b>Resistant, n</b> | <b>Susceptible, n</b> | <b>% Resistant/Tested,<br/>(95% CI)</b> |
|-------------------------|---------------------|-----------------------|-----------------------------------------|
| Amikacin                | 2                   | 39                    | 4.9 (1.1-18.5)                          |
| Cefotaxime              | 11                  | 2                     | 84.6 (52.0-96.5)                        |
| Ceftazidime             | 7                   | 40                    | 14.9 (6.4-30.9)                         |
| Ciprofloxacin           | 10                  | 49                    | 16.9 (7.6-33.7)                         |
| Gentamicin              | 12                  | 46                    | 20.7 (10.0-37.9)                        |
| Meropenem               | 13                  | 44                    | 22.8 (11.6-40.0)                        |
| Cotrimoxazole           | 25                  | 32                    | 43.8 (30.1-58.6)                        |
| Piperacillin-tazobactam | 6                   | 41                    | 12.8 (5.0-28.8)                         |



**Supplementary Table S4.** Characteristics of patients with isolation of *Enterobacteriales* from urine samples

| <b>Total patients, n (%)</b>                                                  | <b>5190 (100.0)</b>  |
|-------------------------------------------------------------------------------|----------------------|
| Sex, F                                                                        | 2637 (50.8)          |
| Age at the 1 <sup>st</sup> sample, median (IQR), min-max values, years        | 1.6 (0.4-6.1), 0-19  |
| ≤6 months                                                                     | 1631 (31.4)          |
| >6 months                                                                     | 3559 (68.6)          |
| Total numbers of pathogens isolated for patient, median (IQR), min-max values | 1 (1-2), 1-40        |
| 1                                                                             | 4065 (78.3)          |
| 2                                                                             | 657 (12.7)           |
| >2                                                                            | 468 (9.0)            |
| <b>Total strains</b>                                                          | <b>7596 (100.0)</b>  |
| Age at sample, median (IQR), min-max values, years                            | 2.3 (0.5-7.9), 0-19  |
| 0-6 months                                                                    | 1945 (25.6)          |
| 7 months-2 years                                                              | 2255 (29.7)          |
| 3 -7 years                                                                    | 1498 (19.7)          |
| >7 years                                                                      | 1898 (25.0)          |
| Department of admission                                                       |                      |
| Emergency                                                                     | 4114 (54.2)          |
| Surgery/Orthopedics/Neurosurgery                                              | 980 (12.9)           |
| Nephrology                                                                    | 697 (9.2)            |
| Infectious Diseases                                                           | 319 (4.2)            |
| Hematology/Oncology                                                           | 283 (3.7)            |
| Neonatal or Pediatric ICU                                                     | 238 (3.1)            |
| Others                                                                        | 965 (12.7)           |
| Days from previous pathogens isolate, median (IQR), min-max values            | 106 (34-348), 0-4194 |

**Supplementary Table S5.** Distribution of 4902 *Escherichia coli* and 2694 other *Enterobacteriales* resistant to different antibiotics by age at sampling

|                                         | Age at sampling |      |      |                |      |      |                |      |      |
|-----------------------------------------|-----------------|------|------|----------------|------|------|----------------|------|------|
|                                         | 0-6 months      |      |      | >6 months      |      |      | Total          |      |      |
| Antibiotics                             | R % (R/tested)  | S    | N    | R % (R/tested) | S    | N    | R % (R/tested) | S    | N    |
| Amoxicillin-clavulanate                 | 661 (34.8)      | 1239 | 45   | 1748 (32.1)    | 3690 | 213  | 2409 (32.8)    | 4929 | 258  |
| Ciprofloxacin                           | 94 (4.9)        | 1842 | 9    | 631 (11.2)     | 5003 | 17   | 725 (9.6)      | 6845 | 26   |
| Cotrimoxazole                           | 352 (18.2)      | 1585 | 8    | 1771 (31.4)    | 3866 | 14   | 2123 (28.0)    | 5451 | 22   |
| Cefixime                                | 118 (15.7)      | 635  | 1192 | 289 (13.0)     | 1935 | 3427 | 407 (13.7)     | 2570 | 4619 |
| Ceftazidime                             | 159 (8.2)       | 1780 | 6    | 409 (7.3)      | 5223 | 19   | 568 (7.5)      | 7003 | 25   |
| Piperacillin-tazobactam                 | 244 (12.6)      | 1686 | 15   | 597 (10.6)     | 5022 | 32   | 841 (11.1)     | 6708 | 47   |
| Ceftazidime+Gentamicin,<br>n=6648       | 65 (3.7)        | 1708 | 5    | 137 (2.8)      | 4720 | 13   | 202 (3.0)      | 6428 | 18   |
| Piperacillin<br>taz.+Gentamicin, n=6301 | 50 (3.0)        | 1600 | 6    | 126 (2.7)      | 4506 | 13   | 176 (2.8)      | 6106 | 19   |

R=resistant; S=susceptible
